# Supplementary material for: Carbon-supported iron–ionic liquid: an efficient and recyclable catalyst for benzylation of 1,3-dicarbonyl compounds with alcohols
Source: Royal Society of Chemistry journal article supplement (doi:10.1039/c4gc00755g), 2014-01-01
Supplement: c4gc00755g1.pdf [file c4gc00755g1.pdf]

## Supporting information

### Carbon-supported iron-ionic liquid: an efficient and recyclable catalyst for benzylation of 1,3-dicarbonyl compounds with alcohols

Patricia Moriel and Ana B. García\*

*Instituto Nacional del Carbón (CSIC), Francisco Pintado Fe 26, 33011 Oviedo, Spain*

**Scheme S 1.** Reaction between acetylacetone (**1a**) and 1-phenylethanol (**2a**)

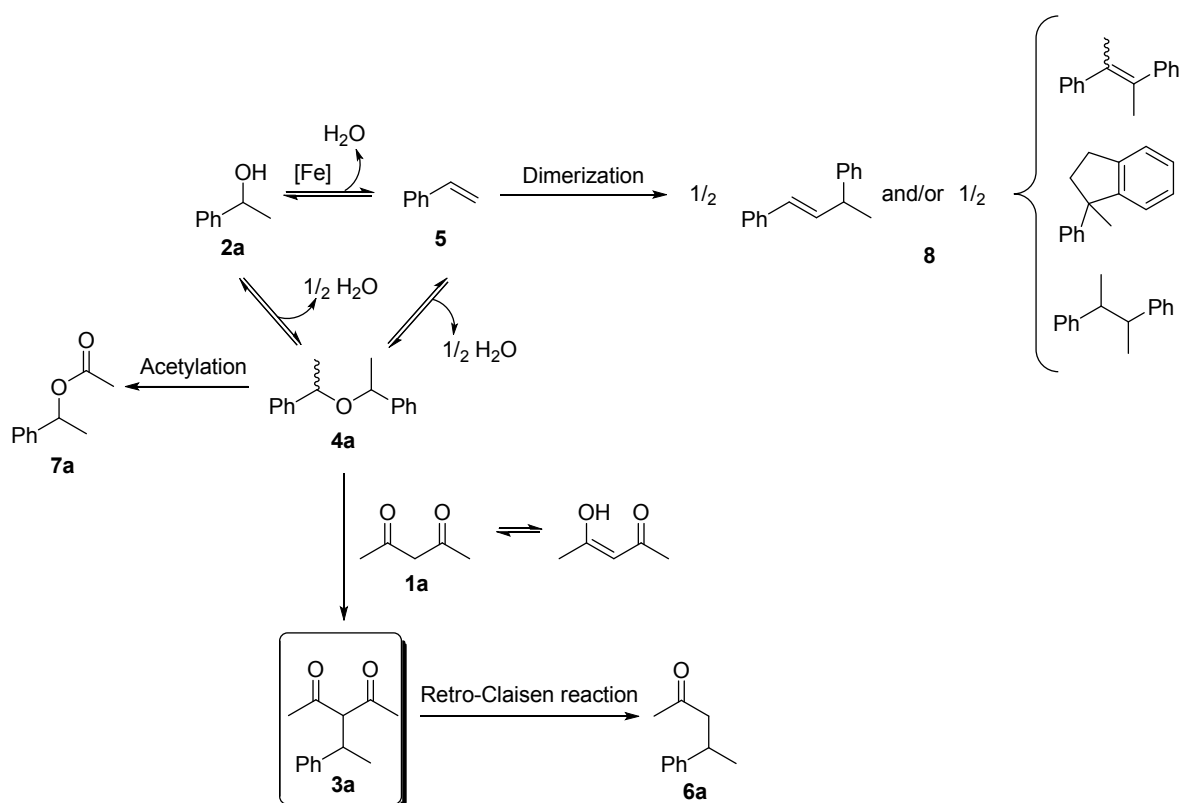

**Table S 1.** Iron-catalyzed reaction of acetylacetone (**1a**) and 1-phenylethanol (**2a**).<sup>[a, b, c]</sup>

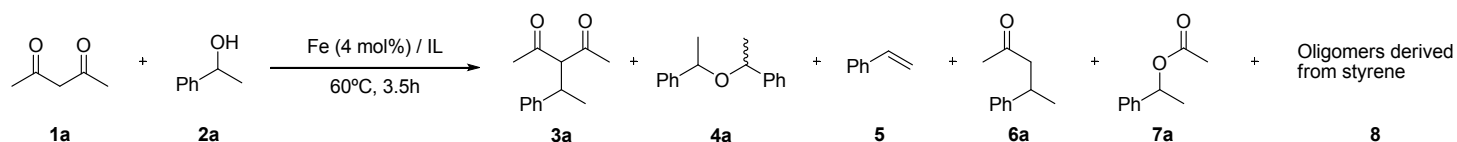

| Entry | Iron source                                           | IL                                                | <b>3a</b><br>(%) | <b>4a</b><br>(%) | <b>5</b><br>(%) | <b>6a</b><br>(%) | <b>7a</b><br>(%) | <b>8</b><br>(%) | Tot<br>(%)         |
|-------|-------------------------------------------------------|---------------------------------------------------|------------------|------------------|-----------------|------------------|------------------|-----------------|--------------------|
| 1     | Fe(OTf) <sub>3</sub>                                  | -                                                 | 23.0             | 74.4             | 1.8             | -                | 0.8              | -               | 100                |
| 2     | Fe(ClO <sub>4</sub> ) <sub>3</sub> ·xH <sub>2</sub> O | BMIMNTf <sub>2</sub>                              | 96.7             | 0.1              | 1.6             | -                | -                | 1.6             | 100                |
| 3     | Fe(OTf) <sub>3</sub>                                  | BMIMNTf <sub>2</sub>                              | 66.8             | 16.4             | 3.9             | -                | 1.1              | 4.2             | 100 <sup>[e]</sup> |
| 4     | Fe(OTf) <sub>3</sub>                                  | BMIMNTf <sub>2</sub> <sup>[d]</sup>               | 78.5             | 9.0              | 2.1             | 0.2              | 0.6              | 9.6             | 100                |
| 5     | FeCl <sub>3</sub> ·6H <sub>2</sub> O                  | BMIMNTf <sub>2</sub>                              | 48.5             | 49.8             | 1.3             | -                | 0.3              | 0.1             | 100                |
| 6     | Fe(ClO <sub>4</sub> ) <sub>3</sub> ·xH <sub>2</sub> O | N <sub>4111</sub> NTf <sub>2</sub>                | 68.7             | 24.7             | 1.9             | -                | 0.7              | 4.0             | 100                |
| 7     | Fe(OTf) <sub>3</sub>                                  | N <sub>4111</sub> NTf <sub>2</sub>                | 79.4             | 10               | 8.6             | -                | 0.9              | 1.1             | 100                |
| 8     | Fe(OTf) <sub>3</sub>                                  | N <sub>4111</sub> NTf <sub>2</sub> <sup>[d]</sup> | 85.5             | 9.0              | 3.4             | -                | 1.0              | 1.1             | 100                |
| 9     | FeCl <sub>3</sub> ·6H <sub>2</sub> O                  | N <sub>4111</sub> NTf <sub>2</sub>                | 44.5             | 53.9             | 1.2             | -                | 0.4              | -               | 100                |
| 10    | Fe(ClO <sub>4</sub> ) <sub>3</sub> ·xH <sub>2</sub> O | BMIMOTf                                           | 46.5             | 46.2             | 5.2             | -                | 2.1              | -               | 100                |
| 11    | Fe(OTf) <sub>3</sub>                                  | BMIMOTf                                           | 21.6             | 67.8             | 8.7             | -                | 1.4              | 0.4             | 99.9               |
| 12    | FeCl <sub>3</sub> ·6H <sub>2</sub> O                  | BMIMOTf                                           | 15.2             | 82.4             | 1.6             | -                | 0.7              | -               | 99.9               |
| 13    | Fe(ClO <sub>4</sub> ) <sub>3</sub> ·xH <sub>2</sub> O | BMIMBF <sub>4</sub>                               | 5.1              | 50.6             | 0.3             | -                | 1.3              | 0.5             | 57.8               |
| 14    | Fe(OTf) <sub>3</sub>                                  | BMIMBF <sub>4</sub>                               | 9.5              | 68.1             | 0.5             | -                | 2.1              | -               | 80.2               |
| 15    | FeCl <sub>3</sub> ·6H <sub>2</sub> O                  | BMIMBF <sub>4</sub>                               | -                | 12.2             | -               | -                | -                | 0.8             | 13.0               |
| 16    | Fe(ClO <sub>4</sub> ) <sub>3</sub> ·xH <sub>2</sub> O | BMIMPF <sub>6</sub>                               | 13.4             | 82.1             | 0.7             | -                | 0.2              | -               | 96.4               |
| 17    | Fe(OTf) <sub>3</sub>                                  | BMIMPF <sub>6</sub>                               | 23.6             | 74.7             | 1.2             | -                | 0.5              | -               | 100                |
| 18    | FeCl <sub>3</sub> ·6H <sub>2</sub> O                  | BMIMPF <sub>6</sub>                               | 13.3             | 76.7             | 0.8             | -                | 0.4              | -               | 91.2               |

[a] GC conversion of all compounds detected. [b] *General reaction conditions*: 0.5 mmol of **2a**; 4 equiv. of **1a**; 4 mol% Fe; 77 mg of IL; 60 °C for 3.5 h. [c] After 3.5 h the conversions of bis(diphenylmethyl) ether (**4a**) and styrene (**5**) were lacking or remained constant as judged by GC. [d] 100 mg of IL was used. [e] An unidentified product was detected (conversion 7.6 %).

**Table S 2.** Influence of support properties on the catalytic activity of Fe(OTf)<sub>3</sub>-N<sub>4111</sub>NTf<sub>2</sub> catalyst system and advantage of the use of IL.<sup>[a,b]</sup>

| Entry | Catalytic system                                         | 3a (%)      | 4a (%) | 5 (%) | 6a (%) | 7a (%) | 8 (%) | Tot (%) |
|-------|----------------------------------------------------------|-------------|--------|-------|--------|--------|-------|---------|
| 1     | Fe(OTf) <sub>3</sub> -N <sub>4111</sub> TFSI/MB-0        | 3.7         | 53.9   | 0.8   | -      | -      | -     | 58.4    |
| 2     | Fe(OTf) <sub>3</sub> -N <sub>4111</sub> TFSI/MB-LTA      | 4.2         | 47.3   | 1.1   | -      | -      | 0.3   | 52.9    |
| 3     | Fe(OTf) <sub>3</sub> -N <sub>4111</sub> TFSI/MB-2000     | <b>98.2</b> | -      | 1.8   | -      | -      | -     | 100     |
| 4     | Fe(OTf) <sub>3</sub> -N <sub>4111</sub> TFSI/MB-2000-LTA | <b>95.7</b> | 0.2    | 2.2   | 0.3    | -      | 1.6   | 100     |
| 5     | Fe(OTf) <sub>3</sub> /MB-2000                            | 64.7        | 21.5   | 9.5   | 0.2    | 3.1    | 1.0   | 100     |
| 6     | Fe(OTf) <sub>3</sub> /MB-2000-LTA                        | 86.0        | 2.7    | 6.5   | 0.2    | 1.8    | 2.8   | 100     |

[a] GC conversion of all compounds detected. [b] *General reaction conditions*: 0.5 mmol of **2a**; 4 equiv. of **1a**; 286 mg of Fe(OTf)<sub>3</sub>-N<sub>4111</sub>NTf<sub>2</sub>/MB (35 wt% IL; 3.5 wt% iron salt) (3.5 mol% Fe); 60 °C for 3.5 h.

**Table S 3.** Recycling study of Fe-IL catalysts supported on carbon materials.<sup>[a, b]</sup>

| Entry | Catalytic system                                                      | Run | 3a (%) | 4a (%) | 5 (%) | 6a (%) | 7a (%) | 8 (%) | Tot (%) |
|-------|-----------------------------------------------------------------------|-----|--------|--------|-------|--------|--------|-------|---------|
| 1     | Fe(OTf) <sub>3</sub> -N <sub>4111</sub> NTf <sub>2</sub> /MB-2000     | 1   | 98.2   | -      | 1.8   |        | -      | -     | 100     |
|       |                                                                       | 2   | 95.5   | -      | 2.5   |        | -      | 2.0   | 100     |
|       |                                                                       | 3   | 71.9   | 20.0   | 5.2   |        | 0.2    | 2.7   | 100     |
|       |                                                                       | 4   | 49.7   | 43.0   | 3.5   |        | 0.3    | 1.0   | 97.5    |
| 2     | Fe(OTf) <sub>3</sub> -N <sub>4111</sub> NTf <sub>2</sub> /MB-2000-LTA | 1   | 95.7   | 0.2    | 2.2   | 0.3    | -      | 1.6   | 100     |
|       |                                                                       | 2   | 95.2   | 0.4    | 2.5   | 0.1    | 0.1    | 1.7   | 100     |
|       |                                                                       | 3   | 92.3   | 2.1    | 3.2   |        | 0.2    | 2.2   | 100     |
|       |                                                                       | 4   | 93.1   | 0.9    | 3.2   |        | 0.1    | 2.7   | 100     |
|       |                                                                       | 5   | 47.0   | 47.5   | 2.7   | 0.2    | 0.1    | 0.7   | 98.2    |
| 3     | Fe(OTf) <sub>3</sub> -BMIMNTf <sub>2</sub> /MB-2000                   | 1   | 95.5   | -      | 2.7   |        |        | 1.8   | 100     |
|       |                                                                       | 2   | 92.8   | -      | 2.9   | 0.2    |        | 4.1   | 100     |
|       |                                                                       | 3   | 52.5   | 31.4   | 14.0  | 0.1    | 0.3    | 1.4   | 99.7    |
| 4     | Fe(OTf) <sub>3</sub> -BMIMNTf <sub>2</sub> /MB-2000-LTA               | 1   | 94.9   | -      | 3.0   | 0.2    | -      | 1.9   | 100     |
|       |                                                                       | 2   | 96.8   | -      | 2.0   |        |        | 1.6   | 100     |
|       |                                                                       | 3   | 55.8   | 39.3   | 3.2   |        | 0.6    | 1.0   | 99.9    |

[a] GC conversion of all compounds detected. [b] *General reaction conditions*: 0.5 mmol of **2a**; 4 equiv. of **1a**; 286 mg of Fe(OTf)<sub>3</sub>-N<sub>4111</sub>NTf<sub>2</sub>/MB (35 wt% IL; 3.5 wt% iron salt) (3.5 mol% Fe); 60 °C for 3.5 h. **1a** was removed under reduced pressure before the work-up of the reaction mixture.

**Scheme S 2. Heterogeneous iron catalyzed reaction of **1b** and **1c** with **2a**.**

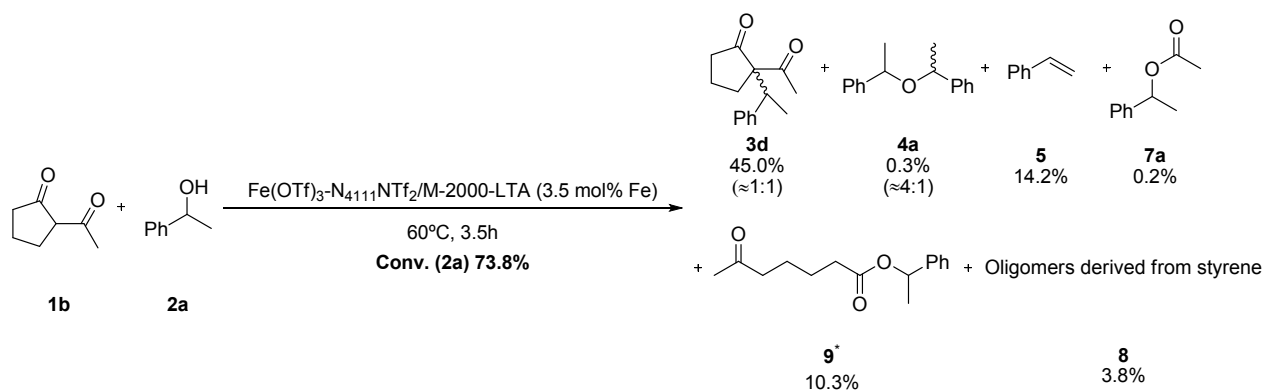

\* **Product 9**: Carbon-carbon bond cleavage through a retro-Claisen condensation type reaction between **1b** and **2a**.<sup>1</sup>

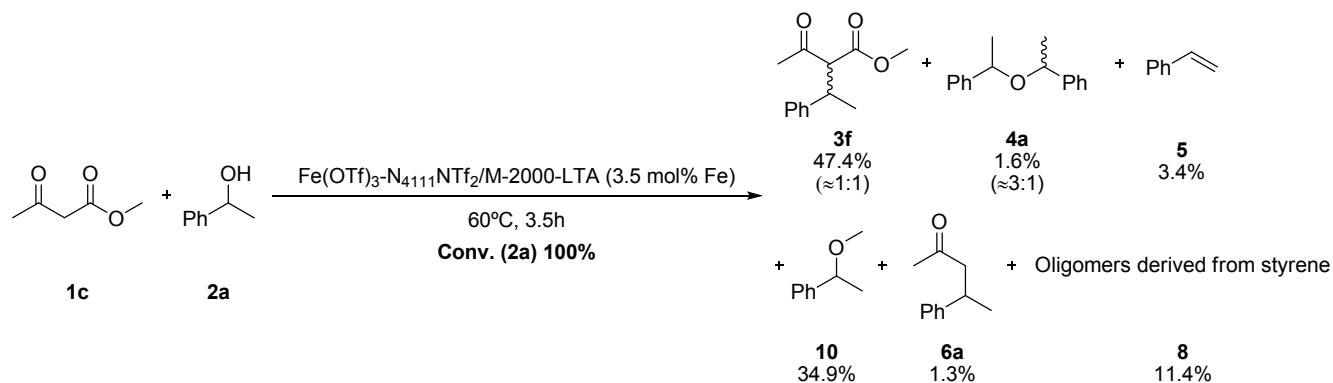

### **Carbon supports characterization**

Surface area, pore volume and pore size distribution of MB-0, MB-2000, MB-LTA and MB-2000-LTA materials were derived from the N<sub>2</sub> adsorption–desorption isotherms performed at 77 K in a Micromeritics ASAP 2420 volumetric adsorption system. Prior to measurement, samples were outgassed overnight by heating at 523 K under vacuum. Specific surface areas ( $S_{\text{BET}}$ ) were calculated using the Brunauer–Emmett–Teller (BET) method, taking 16.2 nm<sup>2</sup> for the cross-sectional area of the nitrogen adsorbed molecule. Total micropore volumes ( $V_{\text{DRN}_2}$ ) were assessed by applying the Dubinin–Radushkevich (DR) equation to the suitable adsorption data. Total pore volumes ( $V_{\text{t}}$ ) were determined by the amount of N<sub>2</sub> adsorbed at  $p/p^0 = 0.99$ . Pore size distributions were obtained by applying the DFT (Density Functional Theory) method to the N<sub>2</sub> adsorption isotherms. X-Ray Photoelectron Spectroscopy (XPS) surface chemical analyses of carbon supports were carried out in a SPECS Phoibos 100 analyser using Mg Ka X-rays (1486.6 eV) at a power of 120 W and in a residual vacuum of 10<sup>-7</sup> Pa. Measurements were made with the analyser in fixed transmission mode and normal to the plane of the sample. Analyser pass energy of 80 eV has been used to collect broad scan spectra (0–1100 eV). The atomic percentages (atom%) of the different elements present in the approx. 10 nm upper layer probed by XPS were calculated from the survey spectra by considering the integrated areas of the main XPS peaks. Representative samples of mesoporous carbon supports (around 150 mg) were tested. Typical standard deviation of the measurements is within ±0.5 atom% of the reported values.
